# Supplementary material for: Improving the Effect of Cancer Cells Irradiation with X-rays and High-Energy Protons Using Bimetallic Palladium-Platinum Nanoparticles with Various Nanostructures
Source: MDPI journal article supplement (doi:10.3390/cancers14235899), 2022-11-29
Supplement: s1 [file s1]

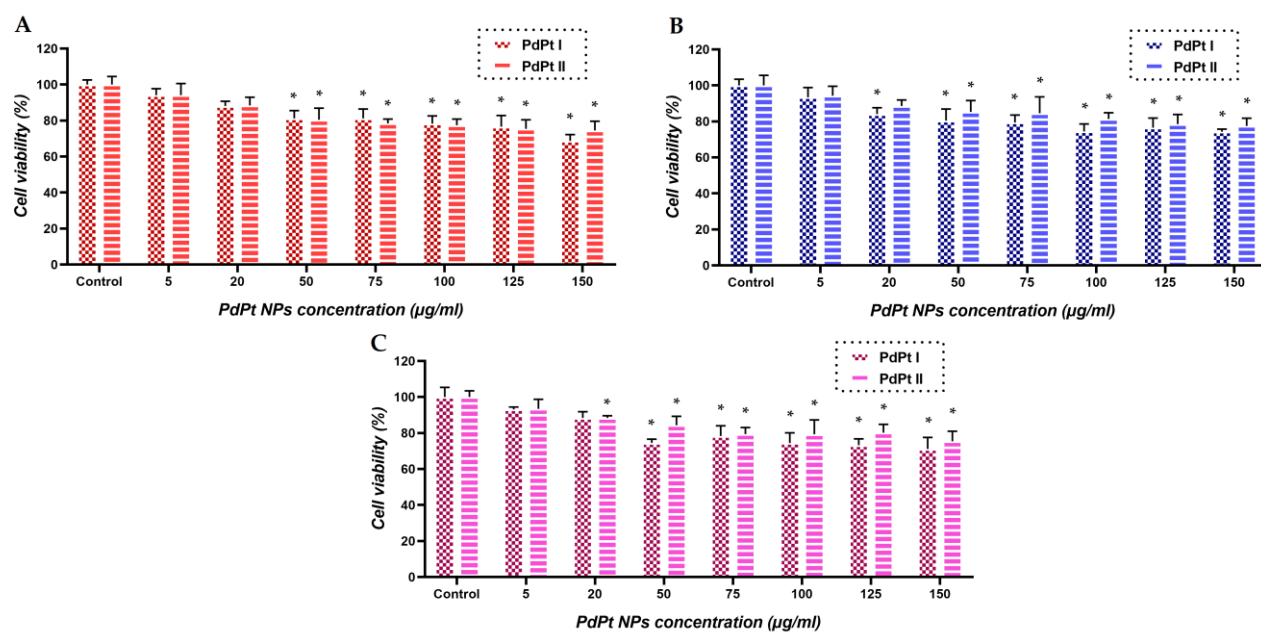

**Figure S1.** Exemplary results of the MTS viability test for the SW480 cell line cultured with both types of PdPt NPs for (A) 3 h, (B) 24 h and (C) 42 h.
